# Supplementary material
Source: PubMed Central journal article supplement (PMC9957871)
Supplement: NIHMS1839622-supplement-supinfo.pdf [file NIHMS1839622-supplement-supinfo.pdf]

**Supplementary Table S1. Multivariable-Adjusted Odds Ratios for 6-Month Mortality.**

| <b>Unadjusted Model (Race Only)</b>                           | <b>OR (95% CI)</b> |
|---------------------------------------------------------------|--------------------|
| Black race                                                    | 1.98 (1.39-2.83)   |
| Intercept                                                     | 0.10 (0.09-0.12)   |
| <b>Adjusted Model 1 (Race and Age)</b>                        |                    |
| Black race                                                    | 2.17 (1.51-3.13)   |
| Age, per year                                                 | 1.09 (1.07-1.12)   |
| Intercept                                                     | 0.00 (0.00-0.00)   |
| <b>Adjusted Model 2 (Race, Age, and Clinical)</b>             |                    |
| Black race                                                    | 1.70 (1.15-2.53)   |
| Age, per year                                                 | 1.07 (1.04-1.09)   |
| Length of stay, per day                                       | 1.06 (1.04-1.09)   |
| Sleep apnea                                                   | 2.04 (1.35-3.09)   |
| Peripheral artery disease                                     | 1.58 (1.12-2.22)   |
| Initial hemoglobin                                            | 0.91 (0.86-0.98)   |
| Heart rate, per bpm <sup>a</sup>                              | 1.09 (1.01-1.17)   |
| Glomerular filtration rate, per mL/min/1.73 m <sup>2</sup>    | 0.98 (0.98-0.99)   |
| Revascularization <sup>b</sup>                                | 0.61 (0.53-0.71)   |
| Ejection fraction <sup>c</sup>                                | 1.38 (1.21-1.57)   |
| Intercept                                                     | 0.00 (0.00-0.03)   |
| <b>Adjusted Model 3 (Race, Age, Clinical, and Functional)</b> |                    |
| Black race                                                    | 1.45 (0.97-2.18)   |
| Age, per year                                                 | 1.06 (1.03-1.09)   |
| Length of stay, per day                                       | 1.05 (1.03-1.08)   |
| Sleep apnea                                                   | 1.95 (1.28-2.99)   |
| Peripheral artery disease                                     | 1.50 (1.06-2.12)   |
| Initial hemoglobin                                            | 0.95 (0.88-1.01)   |
| Heart rate                                                    | 1.08 (1.00-1.16)   |
| Glomerular filtration rate, per mL/min/1.73 m <sup>2</sup>    | 0.99 (0.98-0.99)   |
| Revascularization                                             | 0.65 (0.56-0.76)   |
| Ejection fraction                                             | 1.34 (1.18-1.53)   |
| Unintentional weight loss > 10 lbs. in past year              | 1.75 (1.31-2.34)   |
| Hearing impairment                                            | 1.16 (1.00-1.35)   |
| SF-12 score <sup>d</sup>                                      | 1.35 (1.16-1.56)   |
| Mobility impairment                                           | 1.25 (1.08-1.44)   |
| Intercept                                                     | 0.00 (0.00-0.00)   |

<sup>a</sup>Heart rate categorized: <50, 50-69, 70-79, 80-89, 90-99, 100-109, 110-129, 130-149, ≥150 beats per minute.

<sup>b</sup>Revascularization categorized: not done, done without percutaneous intervention, done with percutaneous intervention, coronary artery bypass graft.

<sup>c</sup>Ejection fraction categorized: ≥50%, 40-49%, 30-39%, and <30%.

<sup>d</sup>SF-12 score categorized: excellent/very good, good, fair, and poor.
